# Supplementary material for: Activation of hERG3 channel stimulates autophagy and promotes cellular senescence in melanoma
Source: PubMed Central journal article supplement (PMC5008339; doi:10.18632/oncotarget.7831), 2016-03-01
Supplement: oncotarget-07-21991-s001.pdf [file oncotarget-07-21991-s001.pdf]

SUPPLEMENTARY FIGURES

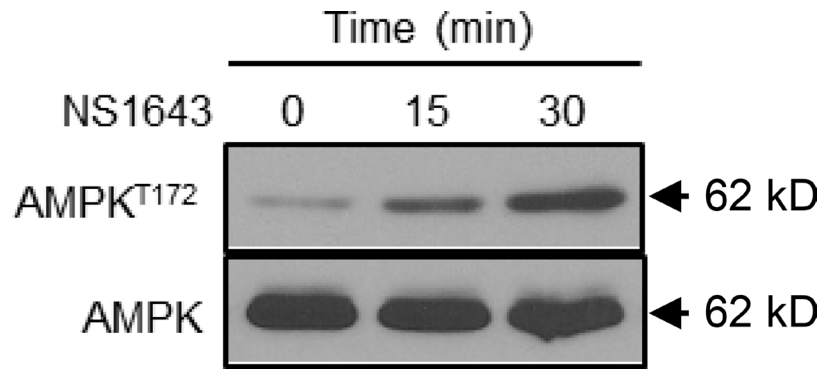

Supplementary Figure S1: Western blot showing NS1643-dependent early activation of AMPK.

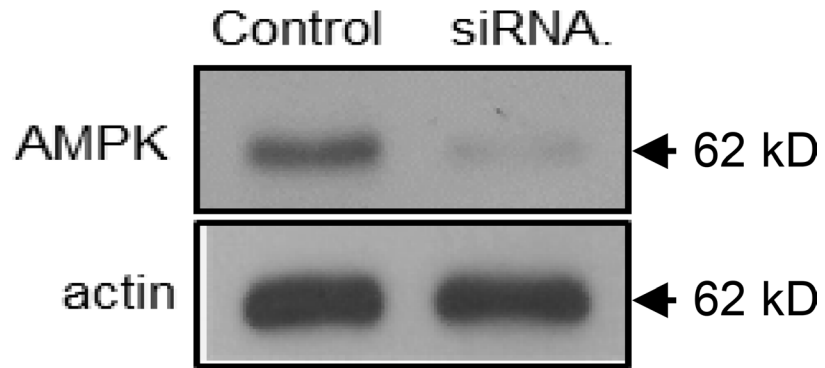

Supplementary Figure S2: Western blot showing the efficacy of siRNA targeting AMPK in A375 melanoma cells.

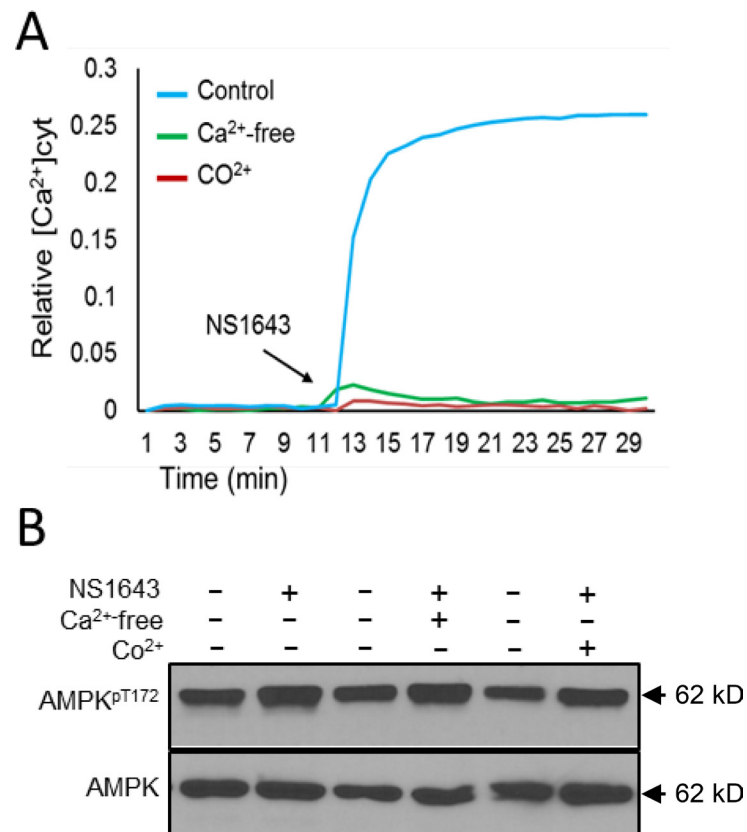

**Supplementary Figure S3: A.** NS1643-induced increases in cytosolic  $[Ca^{2+}]$ , as measured by the Fura-2 ration (F340/F380) in A375 cells bathed in regular ringer (blue trace), Ca<sup>2+</sup>-free ringer (green trace) or regular ringer with 10 $\mu$ M Co<sup>2+</sup> (red trace).  $[Ca^{2+}]$  measurements with fura-2 was performed as previously described in [52]. Baseline luminescence was recorded every minute for 30 min using a PHERAstar plate reader (BMG Labs). **B.** Western blot showing the effect of NS1643 on AMPK activation in cells exposed to regular ringer, Ca<sup>2+</sup>-free ringer, or regular ringer with 10 $\mu$ M Co<sup>2+</sup>.
